# Supplementary material for: Mobile Phone Text Messaging for Tobacco Risk Communication Among Young Adult Community College Students: Protocol and Baseline Overview for a Randomized Controlled Trial
Source: PubMed Central journal article supplement (PMC6231779; doi:10.2196/10977), 2018-10-15
Supplement: resprot_v7i10e10977_app2.pdf [file resprot_v7i10e10977_app2.pdf]

## Multimedia Appendix 2:

Examples of text messages used in our protocol.

|                  | <b>Gain-framed</b>                                                                                                                                          |                                                                                                                                                                               | <b>Loss-framed</b>                                                                                                                  |                                                                                                                                                                   |
|------------------|-------------------------------------------------------------------------------------------------------------------------------------------------------------|-------------------------------------------------------------------------------------------------------------------------------------------------------------------------------|-------------------------------------------------------------------------------------------------------------------------------------|-------------------------------------------------------------------------------------------------------------------------------------------------------------------|
|                  | <b>Simple</b>                                                                                                                                               | <b>Complex</b>                                                                                                                                                                | <b>Simple</b>                                                                                                                       | <b>Complex</b>                                                                                                                                                    |
| <b>Emotional</b> | Yummy, pie!<br>Nonsmokers can appreciate every single bite of homemade apple pie since the nicotine in cigs hasn't messed up their taste buds! :P           | Be astute! Savvy individuals who do not smoke hookah prevent exposure to disgusting tar and carcinogens that the gullible ASSUME are filtered through the pipe's water. :)    | Mike had a hot date on Friday but wouldn't stop smoking cigs with his pals. Now he has rotting yellow teeth & an imaginary date. :( | Hookah smokers are more susceptible to contracting unsightly oral herpes than nonsmokers since mouthpieces are ~ carriers for everyone's disgusting pathogens. :( |
| <b>Rational</b>  | With 7000+ toxic chemicals in cig smoke, the chances of a nonsmoker getting cancer is really low. Why? They aren't exposed to 60+ cancer-causing chemicals. | Individuals who choose not to smoke hookah prevent exposure to tar containing carcinogens. Despite popular belief, ~ these harmful substances are not filtered through water. | Hookah users expose their bodies to a lot of smoke since hookah creates 200x more smoke than a cig.                                 | Why do the 60+ carcinogens in cigarettes pose a direct threat to smokers? ~ Because smokers inhale those carcinogens, raising their chances of developing cancer. |
